# Supplementary material
Source: PubMed Central journal article supplement (PMC5856335)

# THE LANCET

## Infectious Diseases

### **Supplementary appendix**

This appendix formed part of the original submission and has been peer reviewed. We post it as supplied by the authors.

Supplement to: Rojek R, Horby P, Dunning J. Insights from clinical research completed during the west Africa Ebola virus disease epidemic. *Lancet Infect Dis* 2017; published online April 28. [http://dx.doi.org/10.1016/S1473-3099\(17\)30234-7](http://dx.doi.org/10.1016/S1473-3099(17)30234-7).

Subject areas for original research or new data

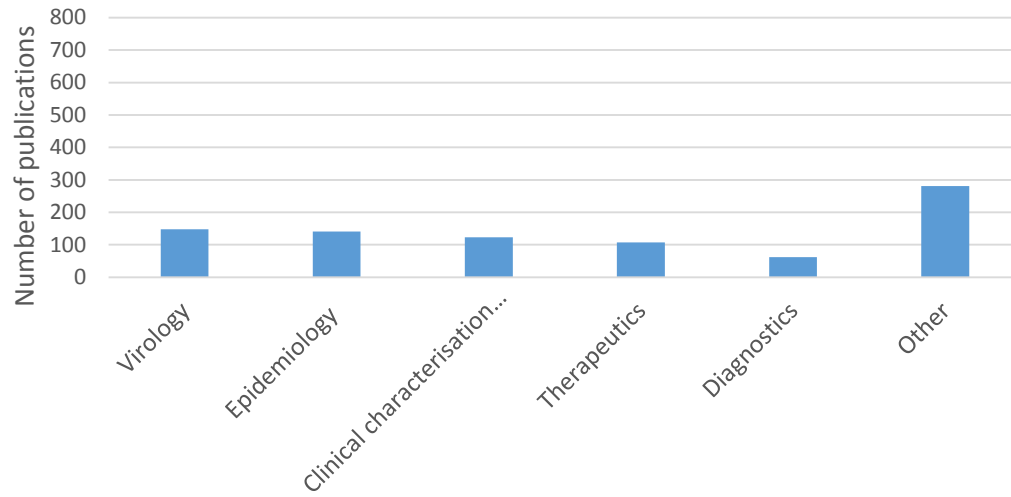

Subject areas for excluded papers

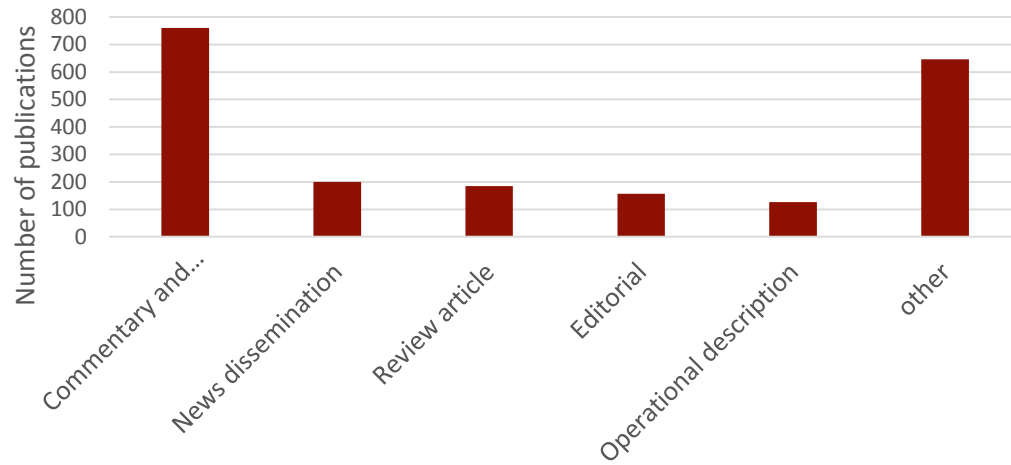

EVD PUBLICATIONS

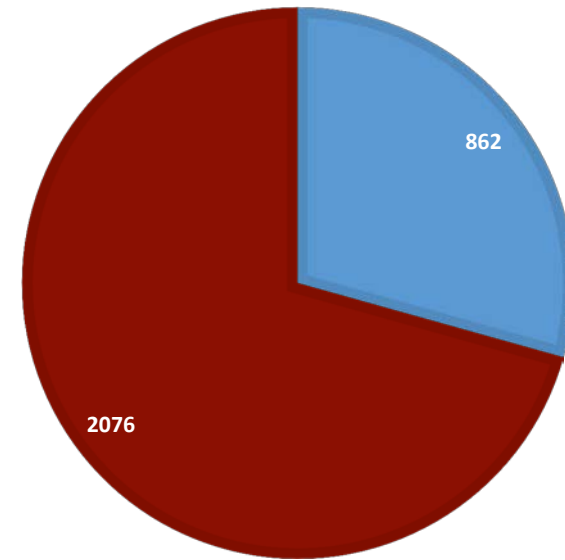

Supplement: NIHMS76472-supplement-Supplementary_Appendix.pdf [file NIHMS76472-supplement-Supplementary_Appendix.pdf]
